# Supplementary material for: Graft-versus-host disease depletes plasmacytoid dendritic cell progenitors to impair tolerance induction
Source: JCI journal article supplement (doi:10.1172/jci136774), 2020-10-22
Supplement: sd1 [file 1]

# SUPPLEMENTAL DATA

**Table S1. Characteristics of pediatric patients whose PB DCs were analyzed**

|                                                                    | 0-I GVHD<br>(n=11) | II-IV GVHD<br>(n=8)   | P value |
|--------------------------------------------------------------------|--------------------|-----------------------|---------|
| Recipient age in years, median (range)                             | 4.9<br>(0.7-17.1)  | 3.7<br>(1.5-10.8)     | 0.46    |
| Recipient sex male, %                                              | 7 (63.6)           | 5 (62.5)              | 1.00    |
| Diagnosis                                                          |                    |                       |         |
| Malignancy, <i>n</i>                                               | 5                  | 8                     | 0.04    |
| Bone Marrow Failure, <i>n</i>                                      | 3                  | 0                     |         |
| Immune deficiency, <i>n</i>                                        | 3                  | 0                     |         |
| Graft Source                                                       |                    |                       |         |
| PB stem cells, <i>n</i>                                            | 3                  | 2                     | 0.23    |
| BM stem cells, <i>n</i>                                            | 3                  | 5                     |         |
| CB stem cells, <i>n</i>                                            | 5                  | 1                     |         |
| Donor type                                                         |                    |                       |         |
| Related, <i>n</i>                                                  | 4                  | 5                     | 0.37    |
| Unrelated, <i>n</i>                                                | 7                  | 3                     |         |
| HLA matching                                                       |                    |                       |         |
| ≥8/10, <i>n</i>                                                    | 9                  | 2                     | 0.02    |
| 5/10~7/10, <i>n</i>                                                | 2                  | 6                     |         |
| Conditioning intensity                                             |                    |                       |         |
| Non-ablative, <i>n</i>                                             | 3                  | 0                     | 0.23    |
| Myeloablative, <i>n</i>                                            | 8                  | 8                     |         |
| GVHD prophylaxis regimen                                           |                    |                       |         |
| Cyclosporine plus other, <i>n</i>                                  | 10                 | 6                     | 0.55    |
| Tacrolimus plus other, <i>n</i>                                    | 1                  | 2                     |         |
| Post-transplant ATG and Cyclophosphamide treatment                 | 0                  | 0                     |         |
| Cyclophosphamide treatment                                         | 0                  | 0                     |         |
| CD34 <sup>+</sup> Cells Dose, median (range), ×10 <sup>6</sup> /kg | 1.18 (0.15-6.9)    | 5.80×<br>(0.34~11.96) | 0.19    |
| Relapse, <i>n</i> (%)                                              | 0                  | 1 (12.5%)             | 0.42    |

Comparisons of patient ages, CD34<sup>+</sup> cells dose were analyzed using Mann-Whitney U test. Comparisons of patient characteristics (categorical variables) between GVHD groups were analyzed using Fisher exact test.

**Table S2. Characteristics of adult patients whose PB DCs were analyzed**

|                                      | 0-I GVHD<br>(n=16)   | II-IV GVHD<br>(n=11) | HD<br>(n=11)         | P value |
|--------------------------------------|----------------------|----------------------|----------------------|---------|
| Recipient age in years, mean (range) | 52.28<br>(25.1-67.6) | 59.62<br>(37.5-77.3) | 57.14<br>(37.1-62.9) | 0.53    |
| Recipient sex male, %                | 7 (43.8)             | 7 (63.6)             | 6 (54.54)            | 0.44    |
| Diagnosis                            |                      |                      |                      |         |
| AML, <i>n</i>                        | 13                   | 9                    | N/A                  | 0.90    |
| MDS, <i>n</i>                        | 1                    | 1                    | N/A                  |         |
| Hodgkin lymphoma, <i>n</i>           | 1                    | 0                    | N/A                  |         |
| Myelofibrosis, <i>n</i>              |                      | 1                    | N/A                  |         |
| Mantle cell lymphoma, <i>n</i>       | 1                    | 0                    | N/A                  |         |
| Graft Source                         |                      |                      |                      |         |
| PB stem cells, <i>n</i>              | 15                   | 11                   | N/A                  | 1.00    |
| BM stem cells, <i>n</i>              | 1                    | 0                    | N/A                  |         |
| Donor type                           |                      |                      |                      |         |
| Related, <i>n</i>                    | 4                    | 3                    | N/A                  | 1.00    |
| Unrelated, <i>n</i>                  | 8                    | 4                    | N/A                  |         |
| HLA matching                         |                      |                      |                      |         |
| 8/8, <i>n</i>                        | 13                   | 11                   | N/A                  | 0.25    |
| < 8/8, <i>n</i>                      | 3                    | 0                    | N/A                  |         |
| Conditioning intensity               |                      |                      |                      |         |
| Non-ablative, n                      | 9                    | 7                    | N/A                  | 0.68    |
| Myeloablative, n                     | 7                    | 3                    | N/A                  |         |
| GVHD prophylaxis regimen             |                      |                      |                      |         |
| Cyclosporine plus other, <i>n</i>    | 1                    | 0                    | N/A                  | 1.00    |
| Tacrolimus plus other, <i>n</i>      | 15                   | 11                   | N/A                  |         |
| Relapse, <i>n</i> (%)                | 3 (18.8)             | 2 (18.2)             | N/A                  | 1.00    |

Comparisons of patient ages were analyzed using Kruskal-Wallis test. Comparisons of patient characteristics (categorical variables) between GVHD groups were analyzed using Fisher exact test.

**Table S3. Characteristics of pediatric patients whose BM progenitors were analyzed**

|                                                                       | 0-I GVHD<br>(n=8)          | II-IV GVHD<br>(n=9) | HD<br>(n=12)        |
|-----------------------------------------------------------------------|----------------------------|---------------------|---------------------|
| Recipient age in years, median (range)                                | 4.5<br>(0.8-5.9)           | 3.3<br>(1.3-13.9)   | 31.1<br>(10.9-42.3) |
| Recipient sex male, %                                                 | 5 (62.5)                   | 7 (77.7)            | 4 (33)              |
| Diagnosis                                                             |                            |                     |                     |
| Malignancy, <i>n</i>                                                  | 5                          | 8                   | N/A                 |
| Bone Marrow Failure, <i>n</i>                                         | 3                          | 1                   | N/A                 |
| Graft Source                                                          |                            |                     |                     |
| PB stem cells, <i>n</i>                                               | 3                          | 9                   | N/A                 |
| BM stem cells, <i>n</i>                                               | 4                          | 0                   | N/A                 |
| CB stem cells, <i>n</i>                                               | 1                          | 0                   | N/A                 |
| Donor type                                                            |                            |                     |                     |
| Related, <i>n</i>                                                     | 6                          | 9                   | N/A                 |
| Unrelated, <i>n</i>                                                   | 2                          | 0                   | N/A                 |
| HLA matching                                                          |                            |                     |                     |
| $\geq 8/10$ , <i>n</i>                                                | 4                          | 0                   | N/A                 |
| 5/10~6/10, <i>n</i>                                                   | 4                          | 9                   | N/A                 |
| Conditioning intensity                                                |                            |                     |                     |
| Non-ablative, <i>n</i>                                                | 5                          | 8                   | N/A                 |
| Myeloablative, <i>n</i>                                               | 3                          | 1                   | N/A                 |
| GVHD prophylaxis regimen                                              |                            |                     |                     |
| Cyclosporine plus other, <i>n</i>                                     | 6                          | 7                   | N/A                 |
| Tacrolimus plus other, <i>n</i>                                       | 2                          | 2                   | N/A                 |
| Post-transplant ATG and Cyclophosphamide treatment                    | 0                          | 0                   | N/A                 |
| CD34 <sup>+</sup> Cells Dose, median (range), $\times 10^6/\text{kg}$ | 5.32 $\times$ (0.19-11.39) | 7.09 (2.2-9.54)     |                     |
| Relapse, <i>n</i> (%)                                                 | 2                          | 0                   |                     |

Comparisons of patient ages, CD34<sup>+</sup> cells dose were analyzed using Mann-Whitney U test. Comparisons of patient characteristics (categorical variables) between GVHD groups were analyzed using Fisher exact test.

**Table S4. Antibodies**

| Antibodies                                                 | Source    | Catalog number |
|------------------------------------------------------------|-----------|----------------|
| CD11c Hamster anti-Mouse, PE-Cy7                           | Biolegend | 117318         |
| Brilliant Violet 421™ anti-mouse I-A/I-E Antibody          | Biolegend | 107631         |
| FITC anti mouse CD45R/B220 antibody                        | Biolegend | 103206         |
| Brilliant Violet 605™ anti-mouse/human CD45R/B220 Antibody | Biolegend | 103243         |
| BUV395 Rat Anti-Mouse CD11b                                | BD        | 563553         |
| APC anti-mouse CD86 Antibody                               | Biolegend | 105011         |
| FITC anti-mouse CD80 Antibody                              | Biolegend | 104705         |
| PE anti-mouse CD274 (B7-H1, PD-L1) Antibody                | Biolegend | 155403         |
| PE anti-mouse Siglec H Antibody                            | Biolegend | 129605         |
| APC anti-mouse CD317 (BST2, PDCA-1) Antibody               | Biolegend | 127015         |
| PE anti-mouse CD199 (CCR9) Antibody                        | Biolegend | 128709         |
| FITC anti-mouse CD48 Antibody                              | Biolegend | 103403         |
| APC anti-mouse CD150 Antibody                              | Biolegend | 115909         |
| PE anti-mouse CD135 Antibody                               | Biolegend | 135305         |
| Alexa Fluor® 700 anti-mouse Ly-6A/E (Sca-1) Antibody       | Biolegend | 108141         |
| PE/Cy7 anti-mouse CD117 (c-Kit) Antibody                   | Biolegend | 105813         |
| Alexa Fluor® 647 anti-mouse CD85k (gp49 Receptor) Antibody | Biolegend | 144905         |
| FITC anti-BrdU Antibody                                    | Biolegend | 364103         |
| FITC anti-mouse CD45.2 Antibody                            | Biolegend | 109805         |
| APC-cy7 anti-H2Kd mouse Antibody                           | Biolegend | 116630         |
| FITC anti-mouse CD4 Antibody                               | Biolegend | 100406         |
| Alexa Fluor® 647 anti-mouse FOXP3 Antibody                 | Biolegend | 126407         |
| anti-mouse IFN-g PE/CY7                                    | Biolegend | 505825         |
| Biotin anti-mouse CD3 Antibody                             | Biolegend | 100244         |
| Biotin anti-mouse/human CD45R/B220 Antibody                | Biolegend | 103204         |
| Biotin anti-mouse Ly-6G/Ly-6C (Gr-1) Antibody              | Biolegend | 108404         |
| Biotin anti-mouse/human CD11b Antibody                     | Biolegend | 101204         |
| Biotin anti-mouse TER-119/Erythroid Cells Antibody         | Biolegend | 116204         |
| APC/Cy7 Streptavidin                                       | Biolegend | 405208         |
| LEAF™ Purified anti-mouse IFNAR-1 Antibody                 | Biolegend | 127303         |
| LEAF™ Purified anti-mouse IFN-γ Antibody                   | Biolegend | 505706         |
| LEAF™ Purified anti-mouse TNF-α Antibody                   | Biolegend | 510804         |

|                                                                  |             |            |
|------------------------------------------------------------------|-------------|------------|
| CD85k (Gp49b) Monoclonal Antibody (H1.1), Functional Grade       | eBioscience | 16-5784-85 |
| LEAF purified anti-mouse CD3                                     | Biolegend   | 100223     |
| Hamster anti- mouse CD28                                         | BD          | 553294     |
| FITC anti-human CD3 Antibody                                     | Biolegend   | 300306     |
| FITC anti-human CD20 Antibody                                    | Biolegend   | 302304     |
| FITC anti-human CD19 Antibody                                    | Biolegend   | 302206     |
| FITC anti-human CD16 Antibody                                    | Biolegend   | 302006     |
| FITC anti-human CD15 (SSEA-1) Antibody                           | Biolegend   | 323004     |
| FITC anti-human CD14 Antibody                                    | Biolegend   | 325604     |
| FITC anti-human CD56 (NCAM) Antibody                             | Biolegend   | 318304     |
| BV421 Mouse Anti-Human HLA-DR                                    | BD          | 562804     |
| PE Mouse Anti-Human CD123                                        | BD          | 554529     |
| PE/Cyanine7 anti-human CD1c Antibody                             | Biolegend   | 331516     |
| APC Mouse Anti-Human CD34                                        | BD          | 555824     |
| CD38 Monoclonal Antibody (HB7), FITC                             | eBioscience | 11-0388-42 |
| CD45RA Antibody, APC-eFluor® 780                                 | eBioscience | 47-0458-42 |
| PE/Cyanine7 anti-human CD10 Antibody                             | Biolegend   | 312214     |
| CD115 (c-fms) Monoclonal Antibody (12-3A3-1B10), Super Bright436 | eBioscience | 62-1559-41 |

**Table S5. Primers for real-time RT-PCR**

| Gene name                  | Primer sequence |                                 |
|----------------------------|-----------------|---------------------------------|
| <i>18s</i>                 | Forward         | 5'-CGGCTACCACATCCAAGG-3'        |
|                            | Reverse         | 5'-GCTGCTGGCACCAGACTT-3'        |
| <i>Tcf4</i>                | Forward         | 5'-TTTGCCGTCTTCAGTCTACG-3'      |
|                            | Reverse         | 5'-GCATGAAGAAGGAGCTAGGG-3'      |
| <i>Irf8</i>                | Forward         | 5'-TACAATCAGGAGGTGGATGC-3'      |
|                            | Reverse         | 5'-TTCAGAGCACAGCGTAACCT-3'      |
| <i>Flt3</i>                | Forward         | 5'-CCCTACTTTCCAGGCACATT-3'      |
|                            | Reverse         | 5'-CATTGAACCCTGAGAGCTGA-3'      |
| <i>p16<sup>Ink4a</sup></i> | Forward         | 5'-GTGTGCATGACGTGCGGG-3'        |
|                            | Reverse         | 5'-GCAGTTCGAATCTGCACCGTAG-3'    |
| <i>Spi1</i>                | Forward         | 5'-CGCAAGAAGATGACCTACCA-3'      |
|                            | Reverse         | 5'-ACTTTCTTCACCTCGCCTGT-3'      |
| <i>Ifna</i>                | Forward         | 5'-AAGCCATCCTTGTGCTAAGAGA-3'    |
|                            | Reverse         | 5'-AGCAAGTTGGTTGAGGAAGAG-3'     |
| <i>Ifnb</i>                | Forward         | 5'-TGGGTGGAATGAGACTATTGTT-3'    |
|                            | Reverse         | 5'-CTCCCACGTCAATCAATCTTTCCTC-3' |
| <i>Pdl1</i>                | Forward         | 5'-GCTCCAAAGGACTTGTACGTG-3'     |
|                            | Reverse         | 5'-TGATCTGAAGGGCAGCATTTC-3'     |
| <i>Lilrb4</i>              | Forward         | 5'-ATGGGCACAAAAAGAAGGCTAA-3'    |
|                            | Reverse         | 5'-GGCATAGGTTACATCCTGGGTC-3'    |
| <i>Apoe</i>                | Forward         | 5'-CTGACAGGATGCCTAGCCG-3'       |
|                            | Reverse         | 5'-CGCAGGTAATCCCAGAAGC-3'       |
| <i>Ido</i>                 | Forward         | 5'-CAAGACCTGAAAGCATTGGA-3'      |
|                            | Reverse         | 5'-CACAAAGTCACGCATCCTCT-3'      |

## SUPPLEMENTAL FIGURES

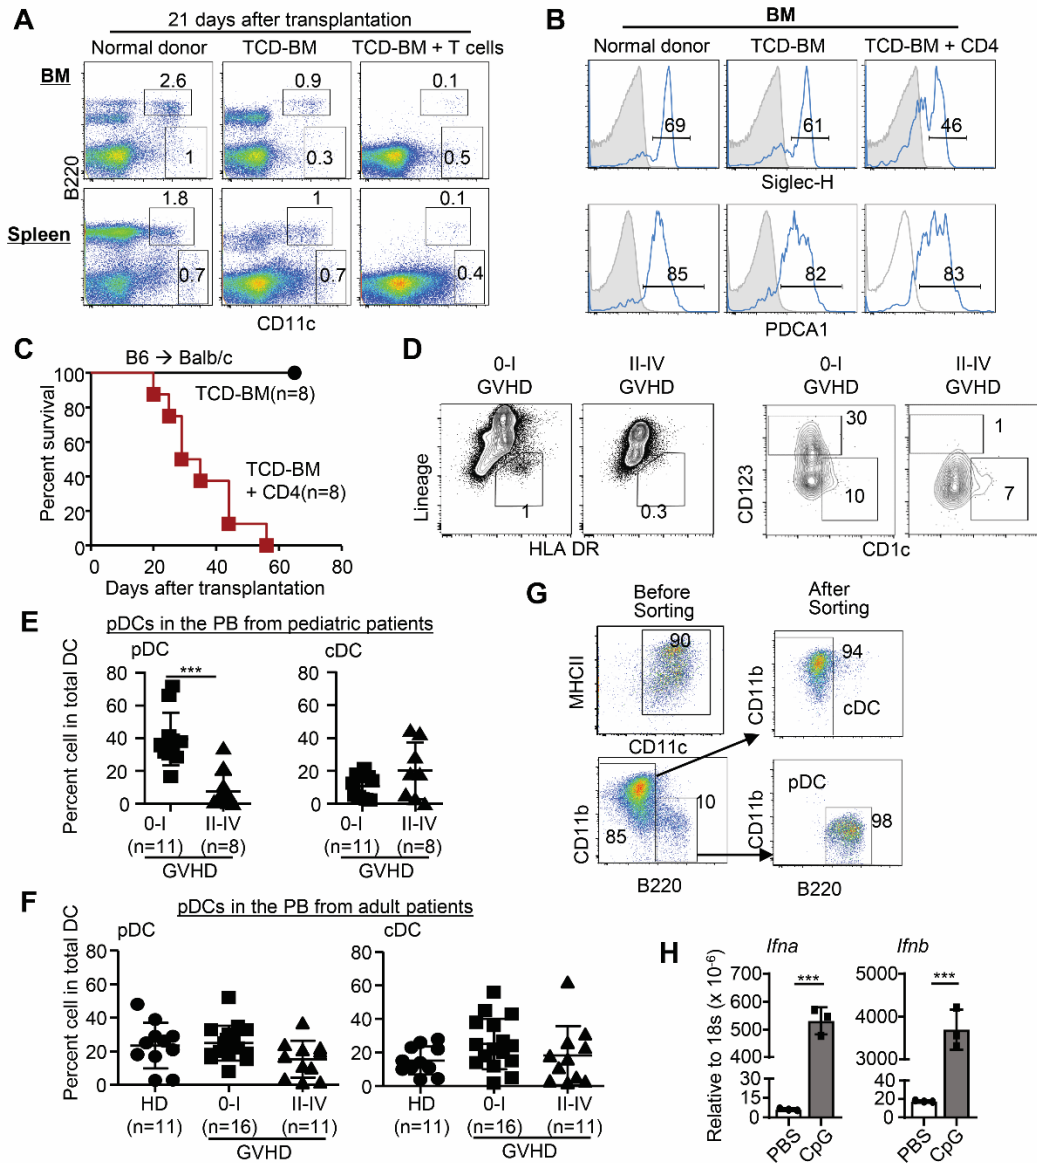

**Figure S1. DC gating strategy and characterization.** (A-C) B6 mouse-derived T cell-depleted bone marrow (TCD-BM) ( $5 \times 10^6$ ) was transplanted, with or without CD4 T cells ( $0.5 \times 10^6$ ), into lethally irradiated BALB/c mice to induce GVHD. (A) Plots show pDCs and cDCs in the BM and spleen at day 21 after transplantation. (B) Histograms show Siglec H and PDCA1 expression on B220<sup>+</sup>CD11c<sup>+</sup> pDCs. (C) Survival of transplant recipient mice were monitored over time. (D) Plots show the fraction of pDCs and cDCs in PB obtained from patients undergoing allo-HSCT. Samples were collected at the time of GVHD onset (between 21 and 50 days after transplantation). (E,F) Plots show the percentage of pDCs and cDCs from human samples derived from the PB of healthy donors (HD) and patients undergoing allo-HSCT that are indicated in Table S1 and Table S2. (G) Donor-type pDCs were ex vivo generated from B6 BM, activated by TLR4 (LPS)- and TLR7/8(R8484)-agonists overnight, and sorted using FACS cell sorter. (H) pDCs were ex vivo generated from B6 BM, activated by TLR9-agonist (CpG) and FACS-sorted. mRNA levels of *Ifna* and *Ifnb* were measured in PBS or CpG stimulated pDCs. Two group comparisons by Mann-Whitney U test (E), multiple comparisons by Kruskal-Wallis test with Dunne's multiple comparison test (F), and two group comparisons by unpaired *t* test (two-tailed) (H). \*\*\*,  $P < 0.001$ .

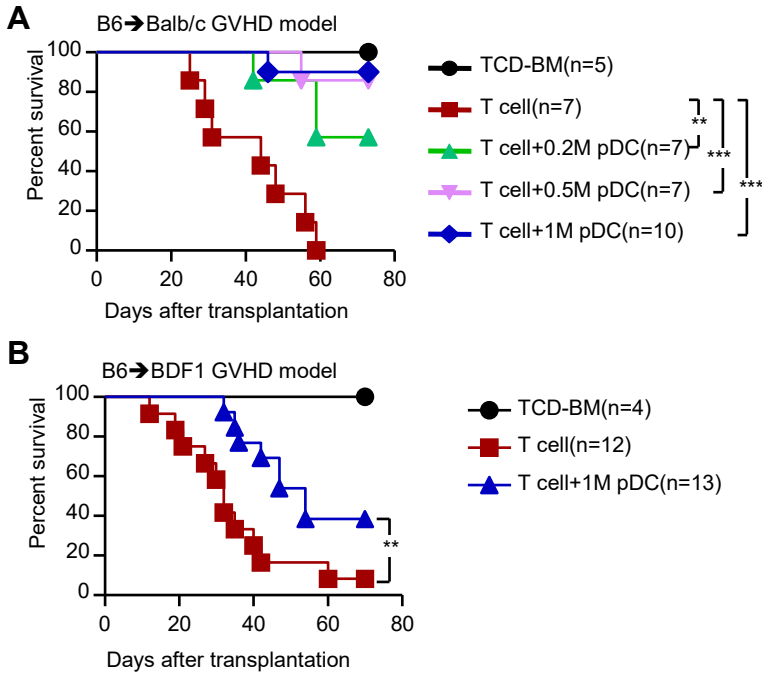

**Figure S2. Donor pDC therapy reduces GVHD in mice.** (A) B6 TCD-BM ( $5 \times 10^6$ ) was transplanted, with or without  $CD4^+$  T cells ( $0.5 \times 10^6$ ), into lethally irradiated (8.5Gys) Balb/c mice, followed with or without injection of  $0.2 \times 10^6$  (0.2M),  $0.5 \times 10^6$  (0.5M) or  $1 \times 10^6$  (1M) B6 pDCs at day 0, 1 and 2. Survival was monitored. (B) B6 TCD-BM ( $5 \times 10^6$ ) was transplanted, with or without  $CD4^+$  T cells ( $1.0 \times 10^6$ ) plus  $CD8^+$  T cells ( $1.0 \times 10^6$ ), into lethally irradiated BDF1 mice to induce GVHD, followed with or without injection of B6 pDCs ( $1 \times 10^6$ ) at day 0, 1 and 2. Survival was monitored and comparisons by Log-rank test. \*\*,  $P < 0.01$ ; \*\*\*,  $P < 0.001$ .

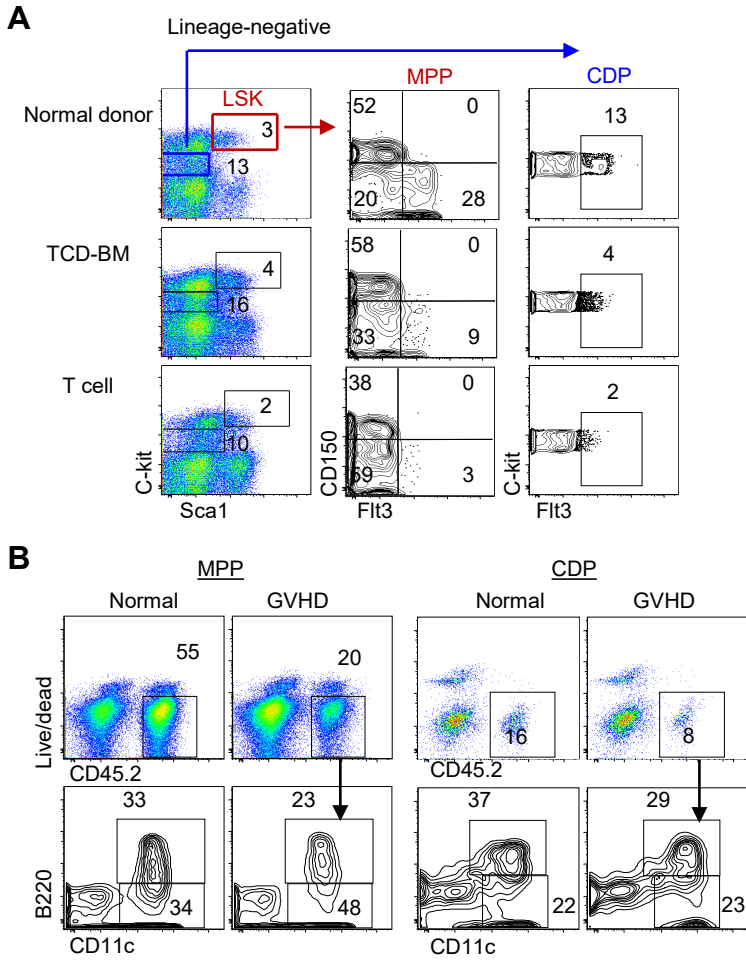

**Figure S3. GVHD causes loss of DC progenitors.** (A) Plots show the phenotype of lineage<sup>-</sup>Sca1<sup>+</sup>c-kit<sup>+</sup> (LSK cells), MPPs and CDPs in the BM from normal, TCD-BM and T cell recipients 21 days post transplantation. (B-C) MPPs and CDPs were FACS-sorted from normal and GVHD mice (CD45.2<sup>+</sup>) and cultured with feeder cells (BM from B6/SJL mice, CD45.1<sup>+</sup>) in the presence of Flt3L + SCF. MPPs were cultured for 9 days. CDPs were cultured for 3 days.

Total human CD34<sup>+</sup> HSPCs in the BM from transplantation recipients

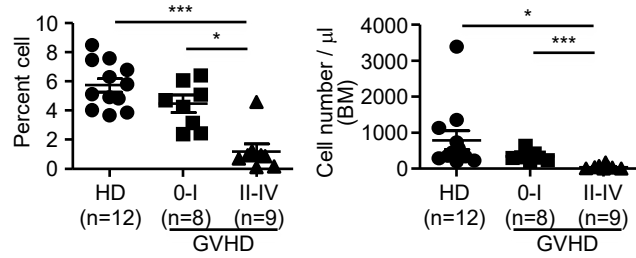

**Figure S4. Decreases of HSCs during GVHD.** Plots and graphs show the percentage and number of human CD34<sup>+</sup> HSPCs from HD (n=12), grade 0-I GVHD patients (n=8) and grade II-IV GVHD patients (n=9). The demographic characteristics of these pediatric patients is indicated in Table S3. Multiple comparisons by Kruskal-Wallis test with Dunn's multiple comparisons test. \*, P<0.05; \*\*, P<0.01; \*\*\*, P<0.001.

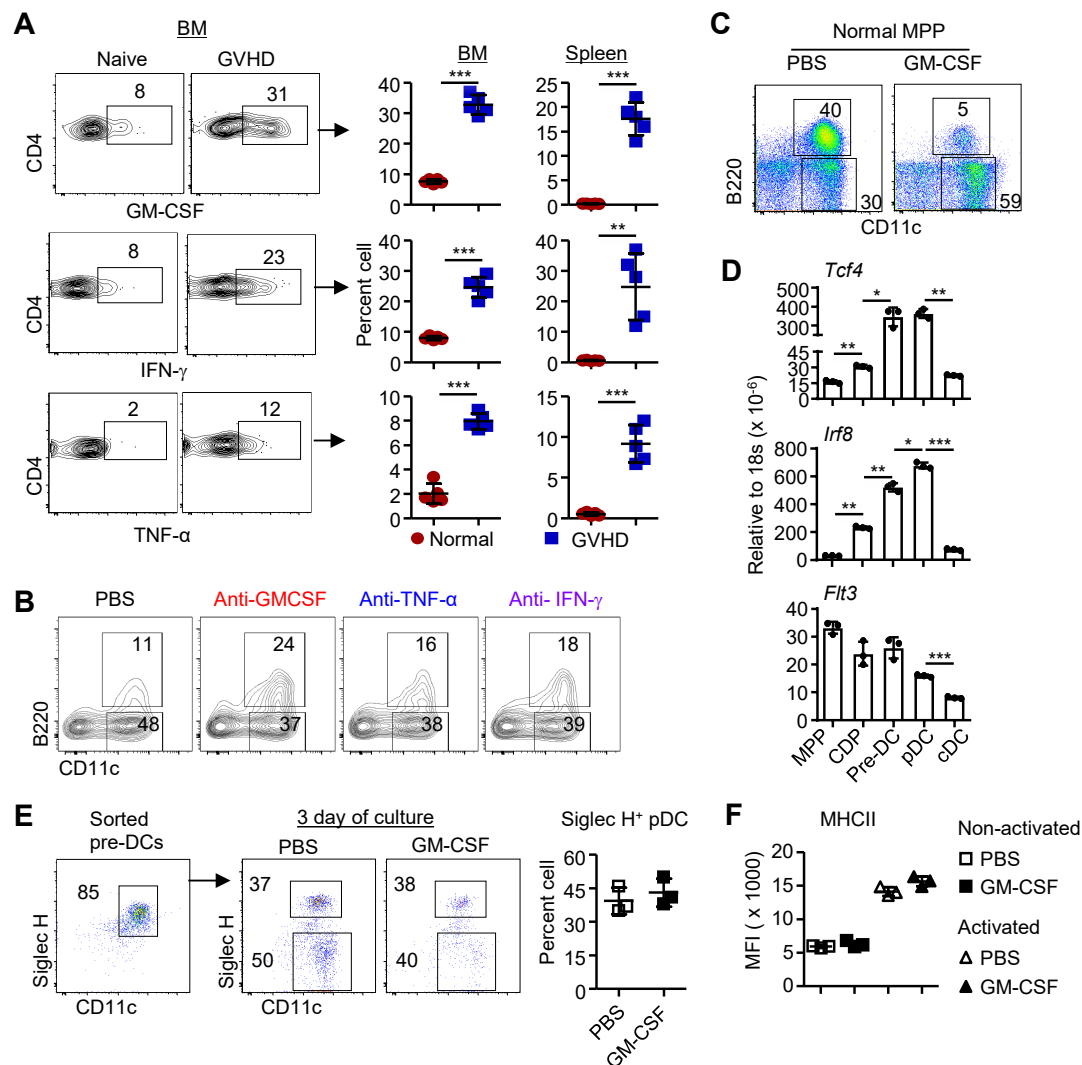

**Figure S5. Cytokine expression of alloreactive T cells and their inhibition effect on pDC generation in vitro.** (A) B6 TCD-BM ( $5 \times 10^6$ ) was transplanted with CD4 T cells ( $5 \times 10^5$ ) into lethally irradiated BALB/c mice. Plots and graphs show representative cytokine expression of T cells from BM and spleen of naïve and GVHD mice 21 days after transplantation (n=5). (B) Neutralizing Abs specific to each cytokine were added to the transwell plate that contained c-kit<sup>+</sup> HSPCs and activated GVHD T cells as mentioned above. Plots show pDC generation 9 days later. (C) GM-CSF (5ng/ml) was added into c-kit<sup>+</sup> HSPCs culture in the presence of Flt3L and SCF. Plots show pDC generation 9 days after culture. (D) Real-time RT-PCR shows gene expression in highly purified cell subsets. (E) Siglec H<sup>+</sup> pre-DCs were purified and cultured in the presence or absence of GM-CSF. Three days later, cells were assessed for mature pDCs. (F) Expression of MHC-II on the surface of matured pDCs. Results shown are representative of at least two independent experiments. Two group comparisons by unpaired *t* test (two-tailed) (A, E), multiple comparisons by Kruskal-Wallis test with Dunn's multiple comparison test (D), and One-way ANOVA with Bonferroni's multiple comparison test (F). \*\*,  $P < 0.01$ ; \*\*\*,  $P < 0.001$ .

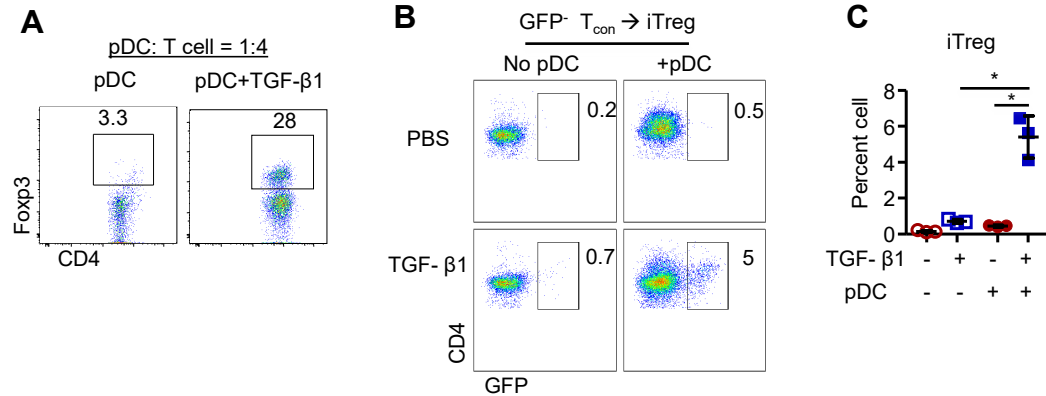

**Figure S6. The impact of donor pDCs on Treg expansion and induction.** (A) B6 T cells were activated by anti-CD3Ab/CD28Ab, in the presence of B6 pDCs at 1:4 ratio of DC:T cells, with or without adding TGF-β1(5ng/ml). Foxp3<sup>+</sup> CD4 T cells were examined at day 7 of culture. (B-C) GFP-CD4<sup>+</sup> T cells were sorted from Foxp3<sup>EGFP</sup> mice that co-express EGFP and Foxp3 under the control of the endogenous promoter. GFP-CD4<sup>+</sup> T cells were termed conventional T cells (Tcon). GFP-CD4<sup>+</sup> Tcon were cultured in the presence or absence of pDCs, with or without adding TGF-β1(5ng/ml), for 5 days. Cells were collected to measure the generation of inducible Tregs (iTregs) using flow cytometry analysis. Multiple comparisons by One-way ANOVA with Boferroni's multiple comparison test (C). \*\*, P<0.01.

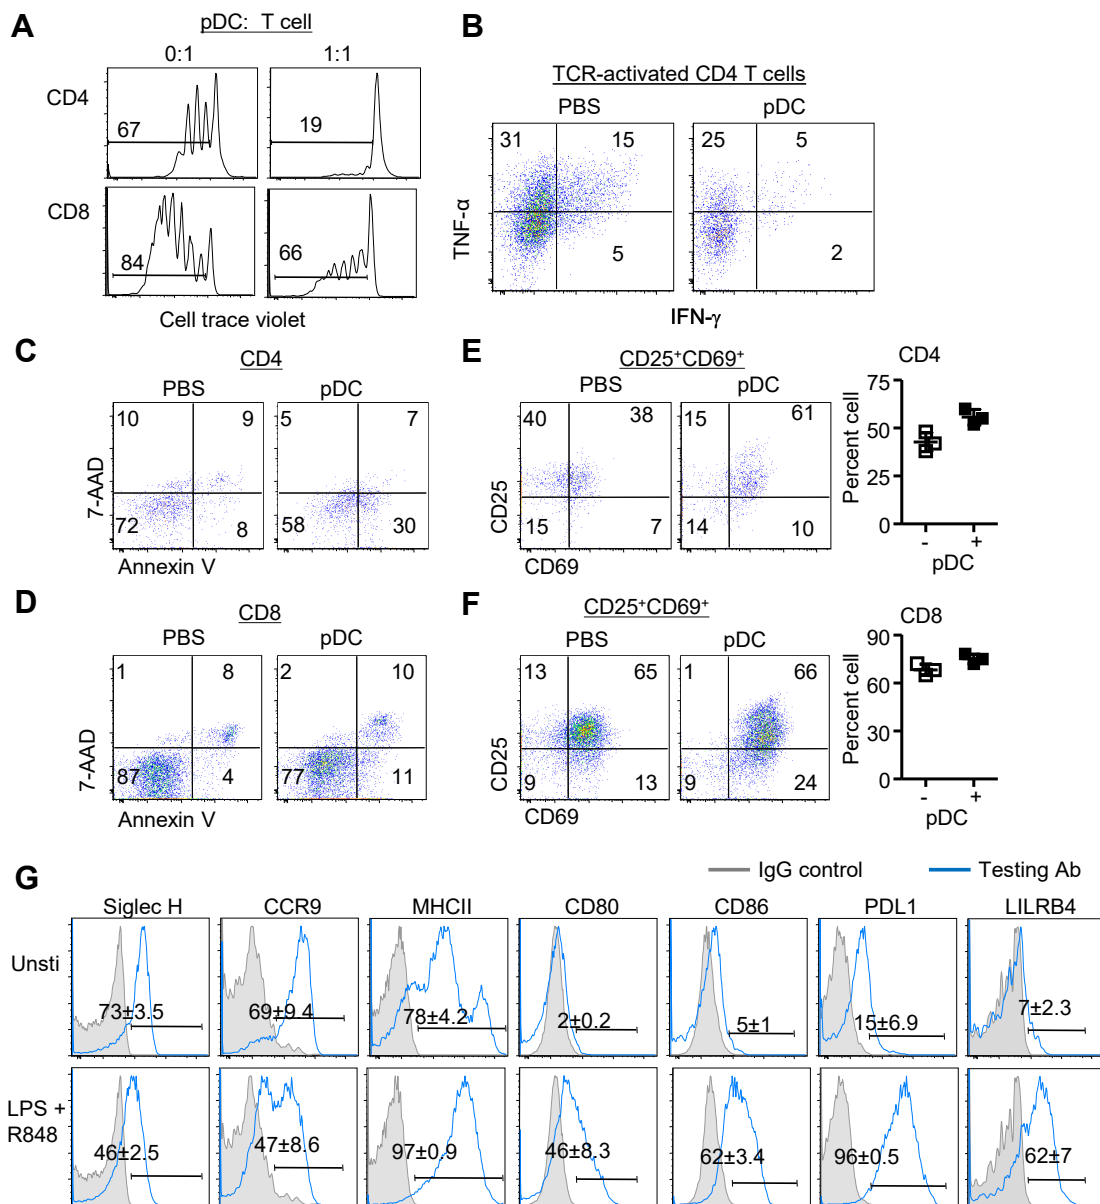

**Figure S7. pDCs are potent suppressors of TCR-activated T cells.** (A-F) Naïve CD4 or CD8 T cells from B6 mice were activated by anti-CD3Ab/CD28Ab with addition of B6 pDCs at a 1:1 ratio. Four days later, cells were tested for their proliferation (A), cytokine production (B), annexin V-positivity in activated CD4 and CD8 T cell culture (C-D) and expression of activation markers on the surface of CD4 T cells (E-F). (G) Histograms show surface expression of tested molecules on the surface of ex vivo generated B6 pDCs before and after activation of TLR4 and TLR7/8. Results shown are representative of 3 to 4 independent experiments.

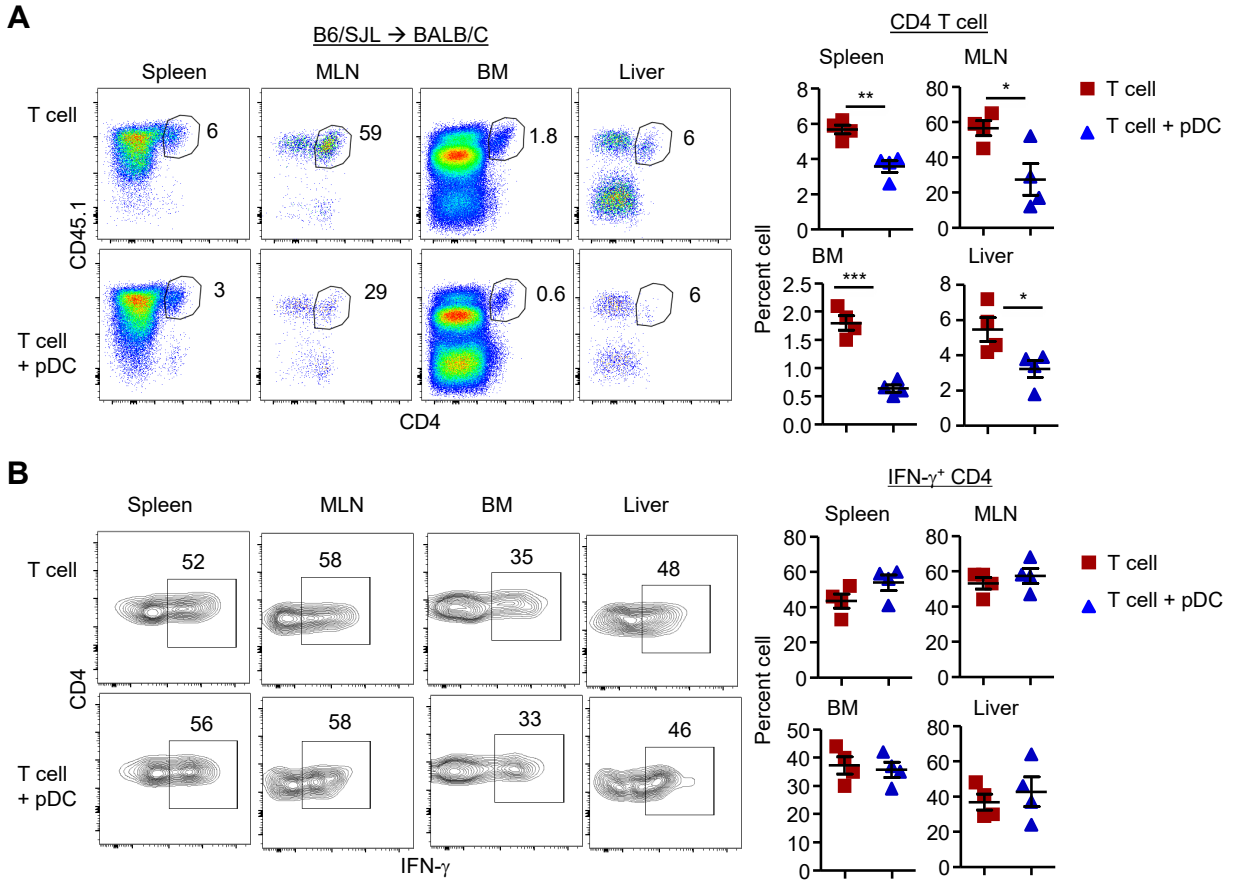

**Figure S8. Cytokine expression of T cells 7 days post HSCT. (A)** B6/SJL TCD-BM + CD4 T cells were transferred to lethally irradiated BALB/c mice ( $n=4$ , each group), followed by injection of B6 pDCs at days 0, 1 and 2 or no treatment. Donor cells were collected at day 7. Plots and graphs show fractions of CD4 T cells in donor cells and cytokine expression from the BM, spleen, liver and MLN. **(B)** Plots and graphs show the fraction of IFN- $\gamma$ -producing cells. Two group comparisons by unpaired  $t$  test (two-tailed). \*,  $P<0.05$ ; \*\*,  $P<0.01$ ; \*\*\*,  $P<0.001$ .

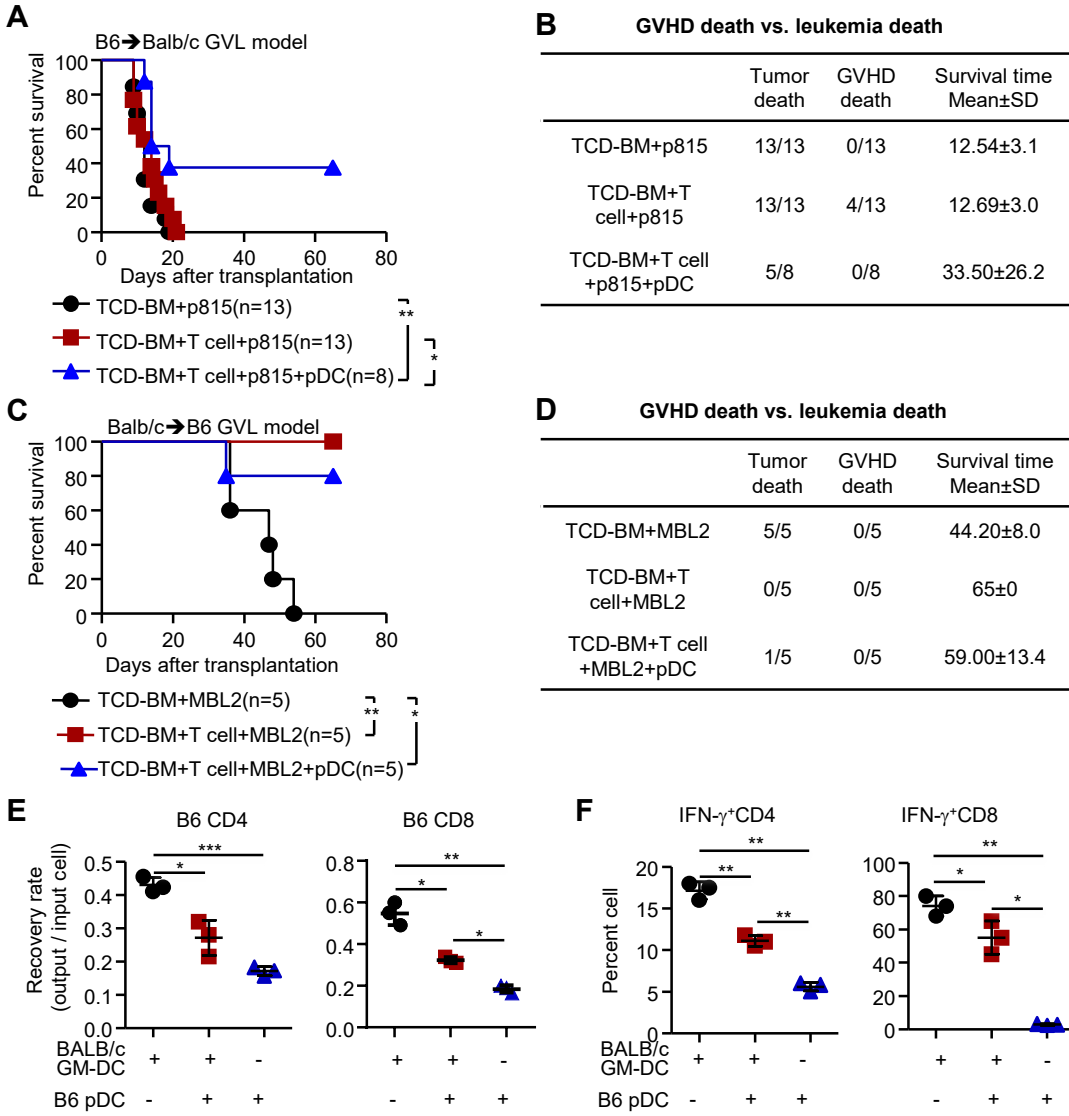

**Figure S9. Donor pDC therapy preserves anti-leukemia activity of donor T cells in mice undergoing allo-HSCT.** (A-B) Lethally irradiated BALB/c recipients (8.5 Gy) received B6 TCD-BM ( $5 \times 10^6$ ), with or without CD4<sup>+</sup> cells ( $0.5 \times 10^6$ ) and challenged with P815 mastocytoma cells ( $3 \times 10^3$ ). B6 pDCs ( $1 \times 10^6$ ) were administered to these recipients at days 0, 1 and 2. Survival, leukemia death and GVHD death (histological examination) were monitored. (C-D) Lethally irradiated B6 recipients (10.0 Gy) received BALB/c TCD-BM ( $5 \times 10^6$ ), with or without CD4<sup>+</sup> T cells ( $0.5 \times 10^6$ ) and CD8<sup>+</sup> T cells ( $0.5 \times 10^6$ ), and challenged with MBL2 AML cells ( $3 \times 10^4$ ). B6 pDCs ( $1 \times 10^6$ ) were administered to these recipients at days 0, 1 and 2. Survival, leukemia death and GVHD death (histological examination) were monitored. (E-F) B6 CD4<sup>+</sup> T cells and CD8<sup>+</sup> T cells were cultured in the presence or absence of BALB/c DCs derived from cultured BM cells at a T cell:DC ratio of 4:1. B6 pDCs were added to the culture at a ratio of T cell:pDC of 2:1. Five days later, cells were collected, counted and examined for their production of IFN- $\gamma$ . Data shown in E-F are representative of 2 independent experiments. Survival comparisons by Log-rank test (A, C), and multiple comparisons by One-way ANOVA with Tukey's multiple comparison test (E, F). \*P, <0.05; \*\*P, <0.01; \*\*\*P, <0.001.
